# Supplementary material
Source: PubMed Central journal article supplement (PMC5384035)
Supplement: mmc1.pdf [file mmc1.pdf]

**The American Journal of Human Genetics, Volume 100**

**Supplemental Data**

**Dynamic Role of *trans* Regulation  
of Gene Expression in Relation to Complex Traits**

**Chen Yao, Roby Joehanes, Andrew D. Johnson, Tianxiao Huan, Chunyu Liu, Jane E. Freedman, Peter J. Munson, David E. Hill, Marc Vidal, and Daniel Levy**

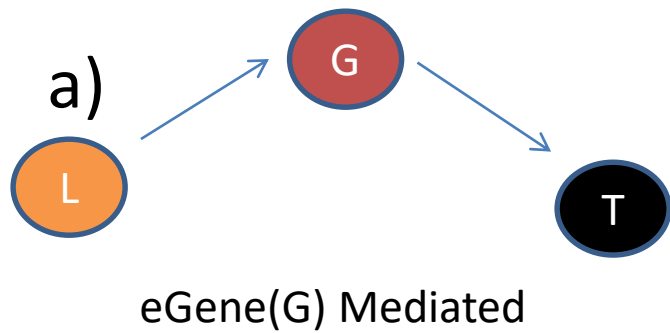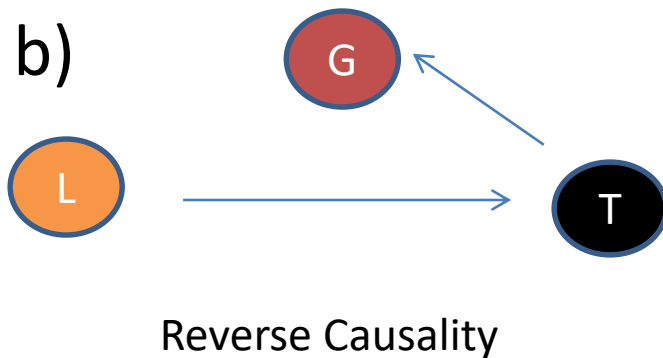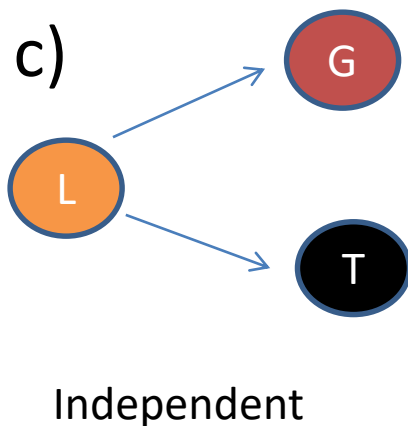

Figure S1. Possible relationships between a causal factor (L), a potential mediator (G) and an outcome (T).

A) The eGene-mediated relationship, in which genotype (L) acts on phenotype (T) through gene expression (G).

B) The reverse causality model, in which gene expression changes (G) are the consequence of phenotype (T).

C) The independent model, in which the genotype affects gene expression (G) and phenotype (T) independently.

If gene expression is a consequence of T (Fig. S1b) or independently affected by L (Fig. S1c), rather than a mediator in the path from G to T (Fig. S1a), the estimated effect of L on T should not be affected by conditioning on G. However, if gene expression is indeed a mediator, this conditioning should drastically reduce the observed effect of L on T (Fig. S1a).

Figure S2 . Genetic effects of A) cis-eQTLs, trans-eQTLs; B) cis-eQTL on trans-hotspots, and trans-eQTLs on trans-hotspots.

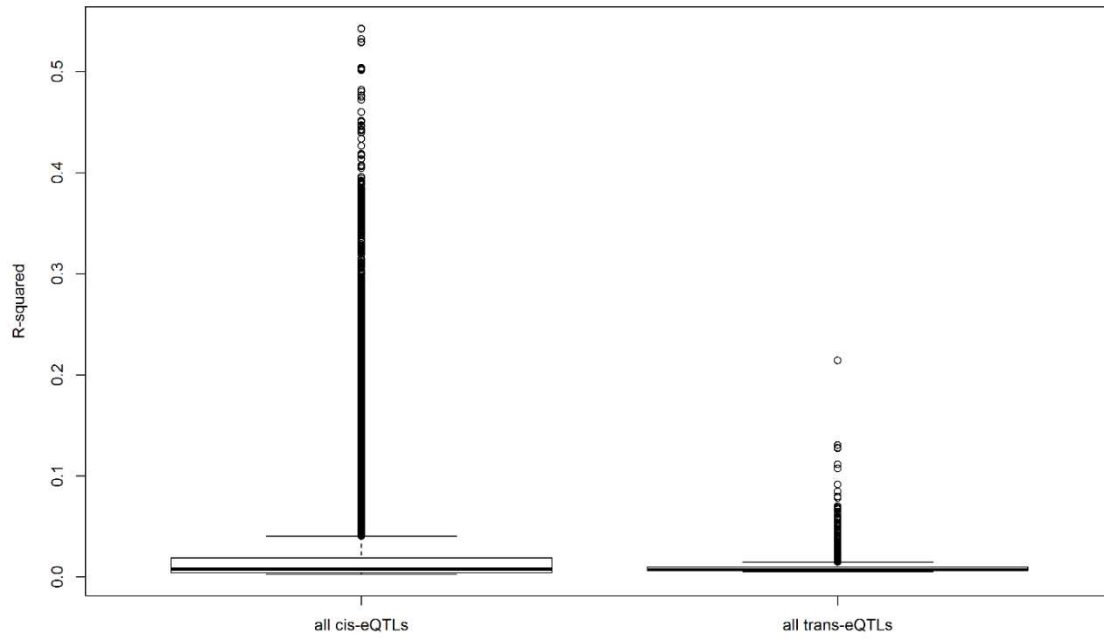

(A)

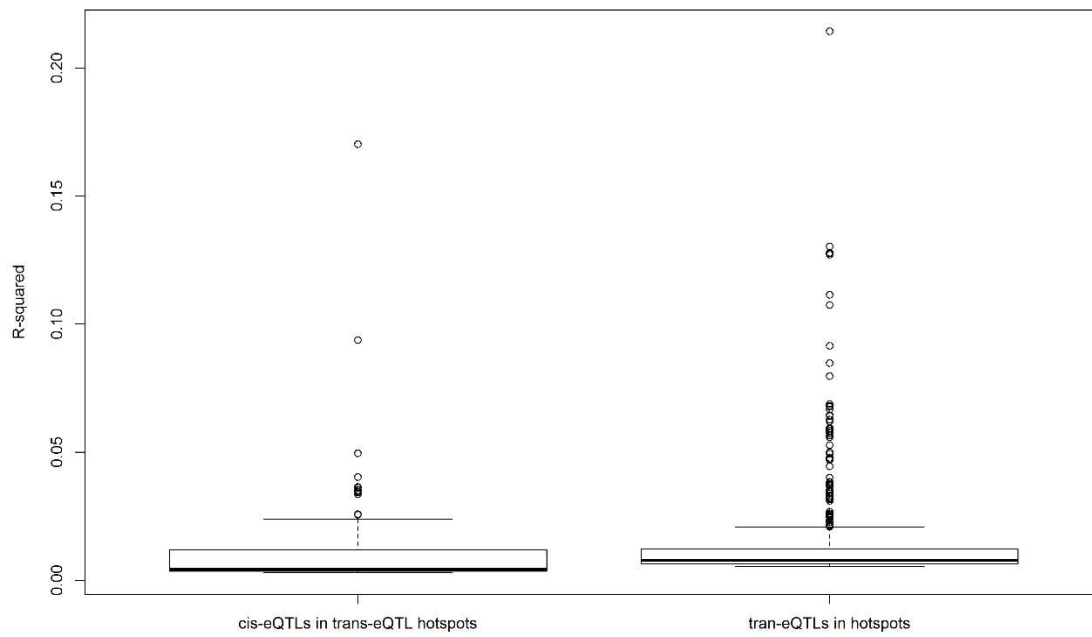

(B)

Figure S3. Protein-protein interactions of *cis*-eGenes (red) and their interaction proteins (blue)

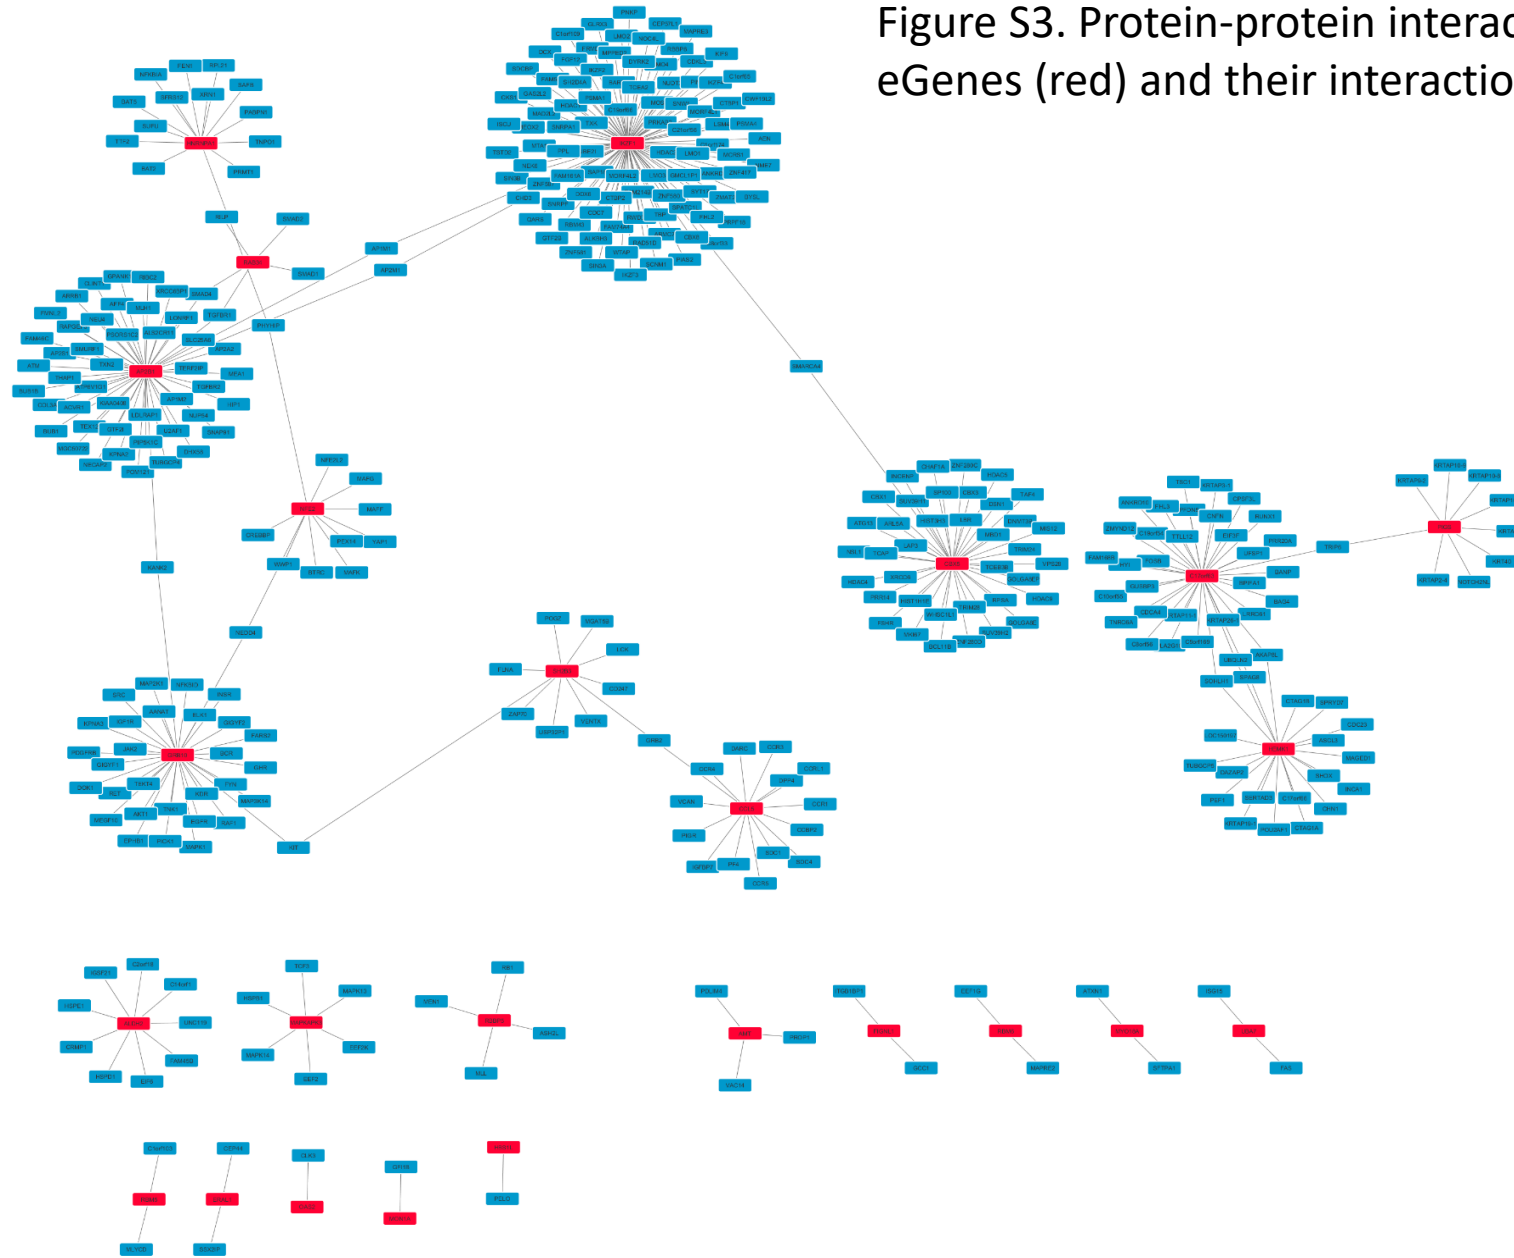

**Table 1. Clinical Characteristics of the Framingham Heart Study Participants**

| <b>Clinical Trait</b>                   | <b>Mean (SD)</b> | <b>Clinical Trait</b>          | <b>Mean (SD)</b> |
|-----------------------------------------|------------------|--------------------------------|------------------|
| Age, years                              | 51 (15.7)        | Total cholesterol, mg/dL       | 188 (36.3)       |
| Sex, male (percentage)                  | 46 %             | Triglycerides, mg/dL           | 116 (83.5)       |
| Fasting blood glucose, mg/dL            | 100 (21.5)       | HDL cholesterol (HDL-C), mg/dL | 56 (17.0)        |
| Body mass index(BMI), kg/m <sup>2</sup> | 27.5 (5.5)       | Hypertension*, (%)             | 40%              |
| Systolic blood pressure (SBP), mm Hg    | 122 (16.6)       | Diabetes mellitus*, (%)        | 8%               |
| Diastolic blood pressure (DBP), mm Hg   | 74 (9.9)         | Lipid treatment, (%)           | 28%              |
| Current Smoker                          | 13%              | Non-drinkers                   | 29%              |
