# Supplementary material
Source: PubMed Central journal article supplement (PMC5384035)
Supplement: mmc8.pdf [file mmc8.pdf]

**Table S8**

| Hotspot location (hg19) | Number of <i>trans</i> -eQTLs | Number of <i>trans</i> -eGenes associated with index eQTL | Traits associated in GWAS with index eQTL     | Gene Ontology Enrichment                                                               |
|-------------------------|-------------------------------|-----------------------------------------------------------|-----------------------------------------------|----------------------------------------------------------------------------------------|
| 3:56849749:56865776     | 2                             | 12684                                                     | Platelet count<br>Mean platelet volume        | RESPONSE_TO_WOUNDING;<br>PLATELET_DEGRANULATION                                        |
| 7: 50423963:50562361    | 19                            | 76                                                        | Childhood acute lymphoblastic leukemia        | CELLULAR_RESPONSE_TO_STRESS;<br>PHOSPHATE_CONTAINING_COMPOUND_METAB<br>TABOLIC_PROCESS |
| 12: 54712308:54736470   | 2                             | 14                                                        | Mean platelet volume                          | PLATELET_AGGREGATION;<br>HOMOTYPIC_CELL_CELL_ADHESION                                  |
| 12:111884608:112610714  | 9                             | 13                                                        | LDL cholesterol;<br>Blood pressure;<br>Asthma | GTPASE_ACTIVITY;<br>GUANYL_NUCLEOTIDE_BINDING;<br>IMMUNE_RESPONSE                      |
| 16:57061189:57061189    | 2                             | 10                                                        | HDL cholesterol                               | ANTIGEN_PROCESSING_AND_PRESENTATION                                                    |
| 17: 33796260:33944055   | 4                             | 51                                                        | Mean platelet volume                          | PLATELET_DEGRANULATION;                                                                |
